# Supplementary material
Source: HighWire-hosted journal article supplement (https://bmjopenquality.bmj.com/highwire/filestream/145505/field_highwire_adjunct_files/0/bmjoq-2022-002166supp001_data_supplement.pdf)
Supplement: bmjoq-2022-002166supp001_data_supplement.pdf [file bmjoq-2022-002166supp001_data_supplement.pdf]

## SURVEY

### Bedside Survey

| Column Heading                                                            | Description                                                                                                                                                                                                                                    |
|---------------------------------------------------------------------------|------------------------------------------------------------------------------------------------------------------------------------------------------------------------------------------------------------------------------------------------|
| Event_ID                                                                  | Records the number of encounters. Add new encounters.                                                                                                                                                                                          |
| Date                                                                      | Date (format 01/01/2021)                                                                                                                                                                                                                       |
| Ward                                                                      | Name of the ward where data were collected                                                                                                                                                                                                     |
| Supervisor Job Title                                                      | The person who collected the data (Oral health coordinator)                                                                                                                                                                                    |
| Age<br>(in Years)                                                         | Shows impact as to age groups. If a few months old please use this formula: = 6/12 (6 months). If less than a month use                                                                                                                        |
| Gender (M/F)                                                              | Used as part of demographic data M/F = Male/Female                                                                                                                                                                                             |
| Number of Siblings                                                        | Used to show impact outside of the intervention setting. If                                                                                                                                                                                    |
| Ethnicity                                                                 | Used for demographic data and inequalities data                                                                                                                                                                                                |
| Ethnicity_expanded - AUTOFILL                                             | This column is not to be filled in, it will auto fill the correct                                                                                                                                                                              |
| Postcode                                                                  | Used for demographic data and inequalities data - this is to be filled out in full e.g. SW10 9NH                                                                                                                                               |
| Regularly Visits Dentist? Y/N                                             | Does the child visit a dentist? Y/N = Yes/No                                                                                                                                                                                                   |
| Signposted to dentist? Y/N/NHS/CD                                         | Was the child signposted to a dentist? Y/N? If the child sees a dentist and you signposted to the following: from private to NHS or NHS to specialist NHS practice, write Y - NHS (private to NHS) or Y - CD (community dentist). If the child |
| Toothbrush / Toothpaste Given? Full set/ Timer/<br>Toothbrush/ Toothpaste | Please specify exactly what consumables were given, this helps with budgeting for future funding.                                                                                                                                              |
| Have they seen any info/posters Y/N                                       | This helps with sustainability of the programme - this only counts for information within the hospital                                                                                                                                         |
| what did they see info/posters on? (free text)                            | Please specify what information they saw on the posters                                                                                                                                                                                        |
| were they given info during admission? Y/N                                | This helps with sustainability of the programme - this only                                                                                                                                                                                    |
| what were they given info on? (free text)                                 | Please specify the type of information they were given i.e.                                                                                                                                                                                    |
| child brushes LESS than daily                                             | The child does not brush everyday, only brushes a few times                                                                                                                                                                                    |
| child brushes 1 time per day                                              | The child predominantly brush only once per day morning or                                                                                                                                                                                     |
| child brushes 1-2 times per day                                           | The child brush between one to two times a day as apposed                                                                                                                                                                                      |
| child brushes 2 times per day                                             | The child brushes twice a day, everyday. Write 1 if                                                                                                                                                                                            |
| child brushes more than twice daily                                       | The child brushes more than twice a day, everyday. Write 1                                                                                                                                                                                     |
| sugary drinks less than 3 times per week                                  | This includes homemade smoothies/fruit juice less than 3                                                                                                                                                                                       |
| sugary drinks more than three times per week                              | Sugary drinks more than 3 times a week including once per                                                                                                                                                                                      |
| sugary drinks more than 1 per day                                         | Sugary drinks at least twice per day. Write 1 if applicable. 1=                                                                                                                                                                                |
| sugary foods less than 3 times per week                                   | This includes yoghurts, sugary cereals, spreads, sauces, soups, biscuits, candy etc between 1-3 times per week.                                                                                                                                |

| Column Heading                                                              | Description                                                                                                               |
|-----------------------------------------------------------------------------|---------------------------------------------------------------------------------------------------------------------------|
| sugary foods more than three times per week                                 | Sugary foods more than 3 times per week including once per                                                                |
| sugary foods more than 1 per day                                            | Sugary foods at least twice per day. Write 1 if applicable. 1=                                                            |
| Does current toothpaste have correct fluoride concentration? Y/N/Cant check | Did you check their current toothpaste if they had it? Y = checked N= they had it but you did not check the fluoride      |
| Did you discuss fluoride advice? Yes /No/NA                                 | Did you discuss fluoroide concentration? Y or N                                                                           |
| One thing you have learnt (Free text)                                       | Reviewing what they learnt from the session - write this exactly the way the patient speaks their answer. Reviewing       |
| Learned - Toothpaste/ Fluoride 1 = Y                                        | i.e. correct amount of toothpaste, fluoride concentration of toothpaste, fluoride varnish etc. Put a 1 in the box if this |
| Learned - Brushing                                                          | i.e. brushing twice a day, for two minutes, spit don't rinse etc. Put a 1 in the box if this applies                      |
| Learned - Sugar intake                                                      | i.e. to have savoury snacks, eat and drink sweet things with a main meal, eat less sugar, sugar intake, label read etc    |
| Learned - Dentist                                                           | i.e. community dentist, visit the dentist, book an                                                                        |
| Learned - Nothing                                                           | i.e. I did not learn anything new, I knew this already                                                                    |
| Learned - Other                                                             | i.e. not to dip dummies, take away the bottle by 1, change                                                                |
| One thing you might do differently (free text)                              | Reviewing what they will do differently from what they have learnt - write this exactly the way the patient speaks their  |
| Different -Toothpaste/ Fluoride                                             | i.e. correct amount of toothpaste, fluoride concentration of toothpaste, fluoride varnish etc. Put a 1 in the box if this |
| Different -Brushing                                                         | i.e. brushing twice a day, for two minutes, spit don't rinse                                                              |
| Different -Sugar intake                                                     | i.e. to have savoury snacks, eat and drink sweet things with a main meal, eat less sugar, sugar intake, label read etc    |
| Different -Dentist                                                          | i.e. community dentist, visit the dentist, book an                                                                        |
| Different - Nothing                                                         | i.e. I did not learn anything new, I knew this already                                                                    |
| Different - Other                                                           | i.e. not to dip dummies, take away the bottle by 1, change                                                                |
| Notes                                                                       | You could write some significant info i.e. USS, ED or NBM                                                                 |
| LSOA code                                                                   | Go onto the IMD website and put in the postcode, download the excel spreadsheet and paste LSOA code into                  |
| Borough                                                                     | Go onto the IMD website and put in the postcode, download the excel spreadsheet and paste borough into the                |
| Index of Multiple Deprivation Decile                                        | Go onto the IMD website and put in the postcode, download the excel spreadsheet and paste IOMDD code                      |
| IDACI Decile                                                                | Go onto the IMD website and put in the postcode, download the excel spreadsheet and paste IDACI decile into               |
| Disability                                                                  | Record if the patient has a disability here - no need to be                                                               |
| How likely are you to make this change? Scale 1-10                          | If the patient chooses anything less than 10, record this and                                                             |

## Training Survey

| Column Heading                            | Description                                                                          |
|-------------------------------------------|--------------------------------------------------------------------------------------|
| Event_ID                                  | Records the number of encounters. Add new encounters.                                |
| Date                                      | Date (format 01/01/2021)                                                             |
| Role                                      | Job role (e.g. dental nurse, doctor)                                                 |
| Department                                | Name of the Department (e.g. Neptune, NICU)                                          |
| Site - CW/WM                              | Chelesea and Wenstiinister hospital (CW) or West Middlesex hospital (WM)             |
| <b>One thing you have learnt</b>          | Description of one thing you learned during the training (free text)                 |
| For me - Toothpaste/Fluoride              | Y/N                                                                                  |
| For me - Brushing                         | Y/N                                                                                  |
| For me - Sugar                            | Y/N                                                                                  |
| For me - Dentist                          | Y/N                                                                                  |
| For me - General oral care                | Y/N                                                                                  |
| For me - Nothing                          | Y/N                                                                                  |
| For me - Other                            | Y/N                                                                                  |
| Others - Toothpaste/Fluoride              | Y/N                                                                                  |
| Others - Brushing                         | Y/N                                                                                  |
| Others - Sugar                            | Y/N                                                                                  |
| Others - Dentist                          | Y/N                                                                                  |
| Other - General                           | Y/N                                                                                  |
| Others - Special OH                       | Y/N                                                                                  |
| Others - Other                            | Y/N                                                                                  |
| <b>One thing you might do differently</b> | Description of one thing you might do differently following the training (free text) |
| For me - Toothpaste/Fluoride              | Y/N                                                                                  |
| For me - Brushing                         | Y/N                                                                                  |
| For me - Sugar                            | Y/N                                                                                  |
| For me - Dentist                          | Y/N                                                                                  |
| For me - General oral care                | Y/N                                                                                  |
| For me - Nothing                          | Y/N                                                                                  |
| For me - Other                            | Y/N                                                                                  |
| Others - Toothpaste/Fluoride              | Y/N                                                                                  |
| Others - Brushing                         | Y/N                                                                                  |
| Others - Sugar                            | Y/N                                                                                  |
| Others - Dentist                          | Y/N                                                                                  |
| Other - General                           | Y/N                                                                                  |
| Others - Special OH                       | Y/N                                                                                  |
| Others - Nothing                          | Y/N                                                                                  |
| Others - Signposting                      | Y/N                                                                                  |
| Others - Other                            | Y/N                                                                                  |

## Plan-Do-Study-Act (PDSA) CYCLES

|                      | Plan                                                                                                                                                                                                                                                                                                                            | Do                                                                                                                                                                                                                          | Study                                                                                                                                                                                                                                                                                                                                                                                                                                                                                      | Act                                                                                                                                                                                                                                                                                                                                          | Time    |
|----------------------|---------------------------------------------------------------------------------------------------------------------------------------------------------------------------------------------------------------------------------------------------------------------------------------------------------------------------------|-----------------------------------------------------------------------------------------------------------------------------------------------------------------------------------------------------------------------------|--------------------------------------------------------------------------------------------------------------------------------------------------------------------------------------------------------------------------------------------------------------------------------------------------------------------------------------------------------------------------------------------------------------------------------------------------------------------------------------------|----------------------------------------------------------------------------------------------------------------------------------------------------------------------------------------------------------------------------------------------------------------------------------------------------------------------------------------------|---------|
| <b>Baseline PDSA</b> | Baseline data collection to understand current state of oral health activities (prediction- we will gain key information about oral health metrics at the hospital to inform future measurement).                                                                                                                               | A baseline survey was conducted between the 16th of November 2019 involving 101 children at the hospital (inpatient and outpatient) and their parents.                                                                      | Key findings: 61% of children were from ethnic minority groups and 72% live in the most deprived areas. Most parents reported that they didn't see any health messaging information in the hospital relating to brushing teeth, healthier eating or physical activity (55% not seeing posters, videos or leaflets and 66% not getting advice or information) and 1 in 2 of children reported either eating sugary foods (22%), drinking sugary drinks (9%) or having both (18%) every day. | Results highlighted the opportunity for the programme to impact positive health behaviours among certain marginalised and minority groups (e.g., BAME groups; pre-schoolers; children living in areas of high child poverty; siblings). It also identified an opportunity for improving the quality of health messaging within the hospital. | 2 weeks |
| <b>PDSA 1</b>        | Introduce the supervised toothbrushing (STB) to assess design and feasibility of delivery.                                                                                                                                                                                                                                      | Implemented STB in 4 children's wards (Live on 18/11/19).                                                                                                                                                                   | KPI 2 - increased in the first 2 weeks (19/11/2019 - 1/12/2019) and then dropped due to a reduction in the paediatric ward activity, staff holidays (missing data). The reduction over the following weeks compared to the start of the intervention due to only by a part-time OHC, while before there was a public health fellow.                                                                                                                                                        | Refinement: consider support and resources for holiday periods to support the OHC to support the implementation of the OHP and achieve the overall aims.                                                                                                                                                                                     | 6 weeks |
| <b>PDSA 2</b>        | Use demographic data from bedside survey to assess the potential impact on inequalities (prediction - improve picture of needs and potential impact on inequalities).                                                                                                                                                           | (ii) start collecting demographic data of patients seen for STB (Live on 18/11/19).                                                                                                                                         | It was noticed that postcode data of children seen for STB and data on consumables distributed during STB were only being partially collected by staff, hindering the analysis of needs and potential impact on inequalities.                                                                                                                                                                                                                                                              | Refinement: improve postcode data collection for children seen for STB, and collect consumable data.                                                                                                                                                                                                                                         | 6 weeks |
| <b>PDSA 2a</b>       | (i) Collect complete postcode data, (ii) collect consumable data to see where patients who had consumables were residing and to know if we were giving them to the children who needed them the most (prediction - availability of postcode and consumable data; have a picture of needs and potential impact on inequalities). | (i) Debriefed staff on the need to collect full postcodes and the rationale for this; (ii) Add information on postcodes and consumables in the pro forma (paper sheet filled at the bedside with the patient) (30/12/2019). | Postcode data showing the deprivation level of children receiving STB and consumable data available. Use of this information to understand service users' needs better and as evidence of the programme's potential to address inequalities.                                                                                                                                                                                                                                               | Worthwhile improvement: retained as a permanent change.                                                                                                                                                                                                                                                                                      | ongoing |

|                |                                                                                                                                                                                                                                        |                                                                                                                                                                                                                                                                                                                 |                                                                                                                                                                                                                                                                                                                                                                                            |                                                                                                                                                                                                 |          |
|----------------|----------------------------------------------------------------------------------------------------------------------------------------------------------------------------------------------------------------------------------------|-----------------------------------------------------------------------------------------------------------------------------------------------------------------------------------------------------------------------------------------------------------------------------------------------------------------|--------------------------------------------------------------------------------------------------------------------------------------------------------------------------------------------------------------------------------------------------------------------------------------------------------------------------------------------------------------------------------------------|-------------------------------------------------------------------------------------------------------------------------------------------------------------------------------------------------|----------|
| <b>PDSA 3</b>  | Begin staff training on oral health to assess training suitability and improvement needs (prediction-increase KPI 3).                                                                                                                  | Staff in-person training conducted on 22/12/2019.                                                                                                                                                                                                                                                               | 15 staff members attend the training (increase of KPI 3 from baseline of 0 staff trained) Feedback indicated that session could be made more specific professional groups (e.g. maternity). Emailed evaluation form did not receive many responses.                                                                                                                                        | Refinement: Training materials updated to specific professional groups (e.g. maternity staff). Decision to change evaluation form to be delivery within sessions instead of email post session. | 8 weeks  |
| <b>PDSA 4</b>  | Begin Health promotion activities HPA including distribution of health promotion materials (prediction-increase KPI 1).                                                                                                                | Posters put up on wards, videos go live, and leaflets given to wards and patients (live from 16/12/2019).                                                                                                                                                                                                       | Materials anecdotally well received by staff and patients. Number of materials distributed not monitored at this time. No formal mechanism in place to monitor KPI1.                                                                                                                                                                                                                       | Consider how best to collect KPI 1 data. Decision made to add a question regarding HPA to the bedside survey.                                                                                   | 10 weeks |
| <b>PDSA 4a</b> | Data on HPAs needed to assess KPI 1 (prediction increase of KPI1).                                                                                                                                                                     | Questions regarding proportion of patients and carers seeing health promotion materials at the Trust added to bedside survey (live 6/09/2020).                                                                                                                                                                  | Question works well within the survey and is a simple addition for OHC to administer. KPI 1 now monitored for progress overtime.                                                                                                                                                                                                                                                           | Worthwhile change: continue to monitor.                                                                                                                                                         | ongoing  |
| <b>PDSA 5</b>  | (i) Stop the delivery of STB and staff training to cope with the Covid 19 pandemic.<br>(ii) deliver alternative forms of health promotion activities compatible with the limited access to wards (prediction – reduction in all KPIs). | (i) Supervised tooth-brushing and staff training sessions were suspended from April 2020.<br>(ii) Health promotion material was removed from the ward but continued to be delivered in discharge packs but with limited ability of the team to monitor or assess this distribution. (Live on: 16th March 2020). | (i) No data was collected for all KPIs.<br>(ii) Staff feedback on the need to give ward managers responsibility for oral health resources (discharge packs). This would support the continuation of this intervention without the oral health coordinator (OHC) and embed intervention within each ward.                                                                                   | Start the three interventions again when the Covid risk is minimised. Develop a process for ward staff to access discharge information and packs independently.                                 | 21 weeks |
| <b>PDSA 6</b>  | Resume staff training (prediction – increase in KPI 3).                                                                                                                                                                                | Staff training resumed online only. Courses offered everyday (Resumed on 26/08/20).                                                                                                                                                                                                                             | KPI 3- was improved substantially compared to the pre-pandemic. System flaws were identified in booking system (e.g., system not available to all staff, not able to reach the appropriate clinical staff). Feedback from staff identified that the best way to advertise to clinical staff was through the staff bulletin and they would like a formal recognition for course attendance. | Refinement: adapt process in booking training sessions, advertisement and accreditation.                                                                                                        | ongoing  |

|                |                                                                                                                                                                                                                            |                                                                                                                                                                                                                                                                |                                                                                                                                                                                                                                                                                                                                                                                                                                                                                                                |                                                                                                                                                                            |         |
|----------------|----------------------------------------------------------------------------------------------------------------------------------------------------------------------------------------------------------------------------|----------------------------------------------------------------------------------------------------------------------------------------------------------------------------------------------------------------------------------------------------------------|----------------------------------------------------------------------------------------------------------------------------------------------------------------------------------------------------------------------------------------------------------------------------------------------------------------------------------------------------------------------------------------------------------------------------------------------------------------------------------------------------------------|----------------------------------------------------------------------------------------------------------------------------------------------------------------------------|---------|
| <b>PDSA 6a</b> | Refine booking system for training, CPD accreditation and advertisement (prediction- greater attendance and targeted clinicians will attend the training session, KPI 3 sustained).                                        | Refined the process for booking via Eventbrite. The training session was CPD accredited, and the sessions were advertised within the trust bulletin. (01/10/2020).                                                                                             | Attendance data show that the sessions have been attended by a more targeted group of clinicians. KPI 3- increase in the week following the introduction of the intervention.                                                                                                                                                                                                                                                                                                                                  | Changes were successful with plans to continue to use the booking system and bulletin as needed. Worthwhile improvement. Retain as permanent change                        | ongoing |
| <b>PDSA 7</b>  | Resume STB in Covid free areas (only 1 ward) (Prediction-KPI 2 equal or less than before the pandemic).                                                                                                                    | Supervised toothbrushing resumed on a single Covid free children's ward (live on 10/08/2020).                                                                                                                                                                  | KPI 2 - activities during the first 4 weeks was less than before the pandemic because now STB in only in one ward. Staff reported that the schedule of STB didn't fit well with the ward activity. Parents were very receptive to the intervention and communicated that the service was much needed due to the lack of availability of NHS dentists during the pandemic. Parents also reported that there was a lot of information given throughout the STB, and they would like a summary of the key points. | Refinement: adapt the STB schedule, design, and provide summary documents to parents in future STB sessions.                                                               | ongoing |
| <b>PDSA 7a</b> | Update health promotion material and bedside proforma to include information for children aged less than 12 months (prediction – improve the information available for parents with children < 12 months, increase KPI 2). | A prompt was added to the proforma to highlight the importance in telling parents that from 6 months, brushing twice a day was required. Weening leaflets were provided to support parents in understanding the impact of sugar in diets (live from 11/09/20). | Parent feedback stated <i>"I learnt a lot, there was so much stuff I didn't know. I recently moved from Doha, I didn't know my son needs to see a dentist/ when he should start brushing his teeth. I also did not know about the hidden sugars in yogurts."</i> - mother of a 10 month old baby. KPI 2 was increased compared to the previous week                                                                                                                                                            | Worthwhile improvement: retained as a permanent change.                                                                                                                    | ongoing |
| <b>PDSA 7b</b> | Consolidate a new schedule for STB (prediction – increase in KPI 2, this would be more effective and satisfactory for staff).                                                                                              | New schedule introduced (supervised toothbrushing at 10 am after ward rounds) has been implemented (Live on 03/05/2021).                                                                                                                                       | KPI 2 - increased. Staff reported this was more conducive to their work schedules and were more likely to support visits. The OHC reported that every day they were wasting time waiting for the nurse in charge to find some time to go through the patient list and identify patients eligible for STBs.                                                                                                                                                                                                     | Worthwhile improvement: new schedule retained as a permanent change. Refinement: introduce a system to streamline the identification process of patients eligible for STB. | ongoing |
| <b>PDSA 7c</b> | Introduce a 'dot system' on the inpatient board to alert the OHC of patients suitable for STB. This involved the NIC putting a dot on the bed board next to the patient's                                                  | Introduction of the new system to identify patients suitable for STB (live on: 19th July 2021).                                                                                                                                                                | KPI- 2 – not increased. OHC reported that the 'dot system' system did not work due to the lack of complete medical history information for patients on the board. The                                                                                                                                                                                                                                                                                                                                          | Change not worthwhile. Revert to manual identification of patients and improve staff awareness of eligibility criteria.                                                    | 3 weeks |

|                |                                                                                                                                                                               |                                                                                                                                                                                               |                                                                                          |                                                         |         |
|----------------|-------------------------------------------------------------------------------------------------------------------------------------------------------------------------------|-----------------------------------------------------------------------------------------------------------------------------------------------------------------------------------------------|------------------------------------------------------------------------------------------|---------------------------------------------------------|---------|
|                | name. (Prediction: increase KPI 3, minimise disruption).                                                                                                                      |                                                                                                                                                                                               | need to clarify eligibility criteria for staff was identified.                           |                                                         |         |
| <b>PDSA 7d</b> | (i) Go back to manual identification of patients with clear eligibility criteria; (ii) increase staff awareness of eligibility criteria for STB (Prediction: increase KPI 2). | (i) Eligible patients identified manually; (ii) staff encouraged to consider the oral health of each patient upon admission and report their concerns to the OHC. (live on: 9th August 2021). | KPI 2 - began to increase in the following weeks.                                        | Worthwhile improvement: retained as a permanent change. | ongoing |
| <b>PDSA 8</b>  | Reintroduce health promotion materials to wards (prediction – increase in KPI 1).                                                                                             | (ii) promotional material displayed in the outpatient ward (live on: 7/9/2020) and then in the inpatient area (live on: 5/11/2020)                                                            | KPI 1 - increased during the introduction of promotional material in the inpatient area. | Worthwhile improvement: retained as a permanent change. | ongoing |
| <b>PDSA 9</b>  | Put new posters into bed spaces as many removed during the Covid 19-second wave (prediction - improve KPI 1).                                                                 | 40 new posters (4 per bedspace) were put onto the ward (live from 8/6/2021)                                                                                                                   | KPI 1 increased and a shift in mean was recording from this period.                      | Worthwhile improvement: retained as a permanent change. | ongoing |

## RESULTS

### (i) HEALTH PROMOTION ACTIVITIES

#### KPI 1: Proportion of children/ families that reported seeing promotional material at the Trust

| Time       | Number of people surveyed | Number of people stating that they have seen promotional material | % people that have seen promotional material |
|------------|---------------------------|-------------------------------------------------------------------|----------------------------------------------|
| 13/09/2020 | 10                        | 2                                                                 | 20%                                          |
| 20/09/2020 | 16                        | 1                                                                 | 6%                                           |
| 27/09/2020 | 15                        | 7                                                                 | 47%                                          |
| 04/10/2020 | 12                        | 3                                                                 | 25%                                          |
| 11/10/2020 | 12                        | 5                                                                 | 42%                                          |
| 18/10/2020 | 12                        | 2                                                                 | 17%                                          |
| 25/10/2020 | 19                        | 8                                                                 | 42%                                          |
| 01/11/2020 | 18                        | 1                                                                 | 6%                                           |
| 08/11/2020 | 7                         | 1                                                                 | 14%                                          |
| 15/11/2020 | 12                        | 4                                                                 | 33%                                          |
| 22/11/2020 | 10                        | 6                                                                 | 60%                                          |
| 29/11/2020 | 10                        | 3                                                                 | 30%                                          |
| 06/12/2020 | 10                        | 4                                                                 | 40%                                          |
| 13/12/2020 | 11                        | 5                                                                 | 45%                                          |
| 20/12/2020 | 8                         | 5                                                                 | 63%                                          |
| 27/12/2020 | 7                         | 5                                                                 | 71%                                          |
| 03/01/2021 |                           |                                                                   |                                              |
| 10/01/2021 | 2                         |                                                                   | 0%                                           |
| 17/01/2021 | 12                        | 2                                                                 | 17%                                          |
| 24/01/2021 | 11                        | 5                                                                 | 45%                                          |
| 31/01/2021 | 9                         | 4                                                                 | 44%                                          |
| 07/02/2021 | 7                         | 2                                                                 | 29%                                          |
| 14/02/2021 | 6                         | 3                                                                 | 50%                                          |
| 21/02/2021 | 9                         | 4                                                                 | 44%                                          |
| 28/02/2021 | 14                        | 7                                                                 | 50%                                          |
| 07/03/2021 | 14                        | 4                                                                 | 29%                                          |
| 14/03/2021 | 18                        | 9                                                                 | 50%                                          |
| 21/03/2021 | 17                        | 5                                                                 | 29%                                          |
| 28/03/2021 |                           |                                                                   |                                              |
| 04/04/2021 | 13                        | 2                                                                 | 15%                                          |
| 11/04/2021 |                           |                                                                   |                                              |
| 18/04/2021 |                           |                                                                   |                                              |
| 25/04/2021 | 14                        | 3                                                                 | 21%                                          |
| 02/05/2021 | 6                         | 2                                                                 | 33%                                          |
| 09/05/2021 | 17                        | 5                                                                 | 29%                                          |
| 16/05/2021 | 12                        | 3                                                                 | 25%                                          |
| 23/05/2021 | 19                        | 10                                                                | 53%                                          |
| 30/05/2021 | 12                        | 5                                                                 | 42%                                          |
| 06/06/2021 | 13                        |                                                                   | 0%                                           |
| 13/06/2021 | 13                        | 6                                                                 | 46%                                          |
| 20/06/2021 | 19                        | 14                                                                | 74%                                          |
| 27/06/2021 | 15                        | 10                                                                | 67%                                          |
| 04/07/2021 | 14                        | 10                                                                | 71%                                          |
| 11/07/2021 | 14                        | 9                                                                 | 64%                                          |
| 18/07/2021 | 14                        | 7                                                                 | 50%                                          |
| 25/07/2021 | 12                        | 9                                                                 | 75%                                          |
| 01/08/2021 |                           |                                                                   |                                              |
| 08/08/2021 | 12                        | 8                                                                 | 67%                                          |
| 15/08/2021 | 15                        | 12                                                                | 80%                                          |
| 22/08/2021 | 14                        | 6                                                                 | 43%                                          |
| 29/08/2021 | 9                         | 5                                                                 | 56%                                          |



**(ii) SUPERVISED THOOTHBRUSHING (STB)****KPI 2: Number of children receiving supervised toothbrushing (STB)**

| Time       | Number of people receiving STB |
|------------|--------------------------------|
| 24/11/2019 | 16                             |
| 01/12/2019 | 26                             |
| 08/12/2019 | 14                             |
| 15/12/2019 | 6                              |
| 22/12/2019 |                                |
| 29/12/2019 |                                |
| 05/01/2020 | 1                              |
| 12/01/2020 | 8                              |
| 19/01/2020 | 10                             |
| 26/01/2020 | 6                              |
| 02/02/2020 | 12                             |
| 09/02/2020 | 8                              |
| 16/02/2020 | 13                             |
| 23/02/2020 | 7                              |
| 01/03/2020 | 16                             |
| 08/03/2020 | 7                              |
| 15/03/2020 | 8                              |
| 22/03/2020 |                                |
| 29/03/2020 |                                |
| 05/04/2020 |                                |
| 12/04/2020 |                                |
| 19/04/2020 |                                |
| 26/04/2020 |                                |
| 03/05/2020 |                                |
| 10/05/2020 |                                |
| 17/05/2020 |                                |
| 24/05/2020 |                                |
| 31/05/2020 |                                |
| 07/06/2020 |                                |
| 14/06/2020 |                                |
| 21/06/2020 |                                |
| 28/06/2020 |                                |
| 05/07/2020 |                                |
| 12/07/2020 |                                |
| 19/07/2020 |                                |
| 26/07/2020 |                                |
| 02/08/2020 |                                |
| 09/08/2020 |                                |
| 16/08/2020 | 8                              |
| 23/08/2020 | 5                              |
| 30/08/2020 |                                |
| 06/09/2020 | 3                              |
| 13/09/2020 | 7                              |
| 20/09/2020 | 16                             |
| 27/09/2020 | 15                             |
| 04/10/2020 | 12                             |
| 11/10/2020 | 12                             |
| 18/10/2020 | 12                             |
| 25/10/2020 | 19                             |
| 01/11/2020 | 18                             |
| 08/11/2020 | 7                              |

| Time       | Number of people receiving STB |
|------------|--------------------------------|
| 15/11/2020 | 12                             |
| 22/11/2020 | 11                             |
| 29/11/2020 | 10                             |
| 06/12/2020 | 10                             |
| 13/12/2020 | 11                             |
| 20/12/2020 | 8                              |
| 27/12/2020 | 7                              |
| 03/01/2021 |                                |
| 10/01/2021 | 2                              |
| 17/01/2021 | 12                             |
| 24/01/2021 | 11                             |
| 31/01/2021 | 9                              |
| 07/02/2021 | 7                              |
| 14/02/2021 | 6                              |
| 21/02/2021 | 9                              |
| 28/02/2021 | 14                             |
| 07/03/2021 | 14                             |
| 14/03/2021 | 18                             |
| 21/03/2021 | 17                             |
| 28/03/2021 |                                |
| 04/04/2021 | 13                             |
| 11/04/2021 |                                |
| 18/04/2021 |                                |
| 25/04/2021 | 14                             |
| 02/05/2021 | 6                              |
| 09/05/2021 | 17                             |
| 16/05/2021 | 12                             |
| 23/05/2021 | 19                             |
| 30/05/2021 | 12                             |
| 06/06/2021 | 13                             |
| 13/06/2021 | 13                             |
| 20/06/2021 | 19                             |
| 27/06/2021 | 15                             |
| 04/07/2021 | 14                             |
| 11/07/2021 | 14                             |
| 18/07/2021 | 14                             |
| 25/07/2021 | 12                             |
| 01/08/2021 |                                |
| 08/08/2021 | 12                             |
| 15/08/2021 | 15                             |
| 22/08/2021 | 14                             |
| 29/08/2021 | 9                              |

**Age of children participating in STB**

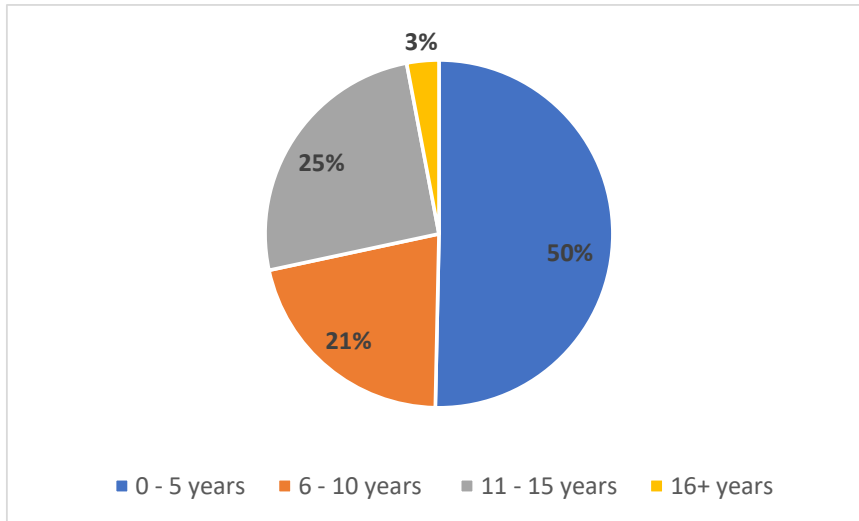

| 0 - 5 years | 6 - 10 years | 11 - 15 years | 16+ years |
|-------------|--------------|---------------|-----------|
| 50%         | 21%          | 25%           | 3%        |
| 371         | 157          | 187           | 22        |

**Ethnicity of children participating in STB**

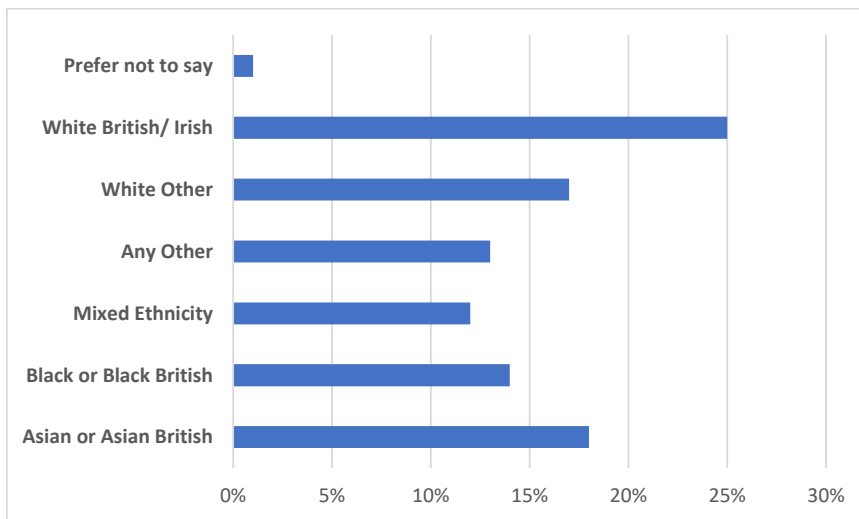

| Asian or Asian British | Black or Black British | Mixed Ethnicity | Any Other | White Other | White British/ Irish | Prefer not to say |
|------------------------|------------------------|-----------------|-----------|-------------|----------------------|-------------------|
| 18%                    | 14%                    | 12%             | 13%       | 17%         | 25%                  | 1%                |
| 134                    | 103                    | 88              | 94        | 127         | 183                  | 8                 |

**IDACI Quintiles**

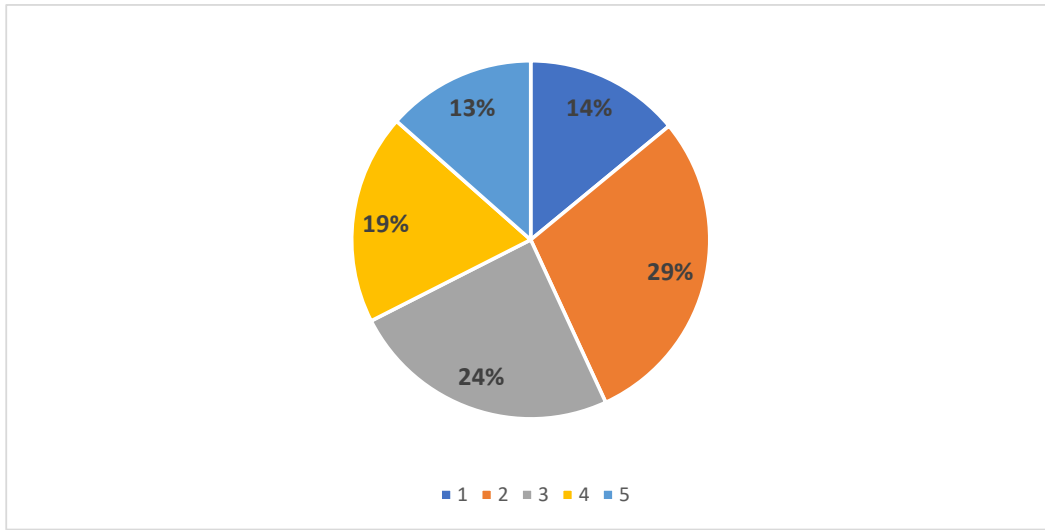

| 1   | 2   | 3   | 4   | 5   |
|-----|-----|-----|-----|-----|
| 14% | 29% | 24% | 19% | 13% |
| 99  | 205 | 172 | 134 | 95  |

**Themes of learning reported by patients/ families**

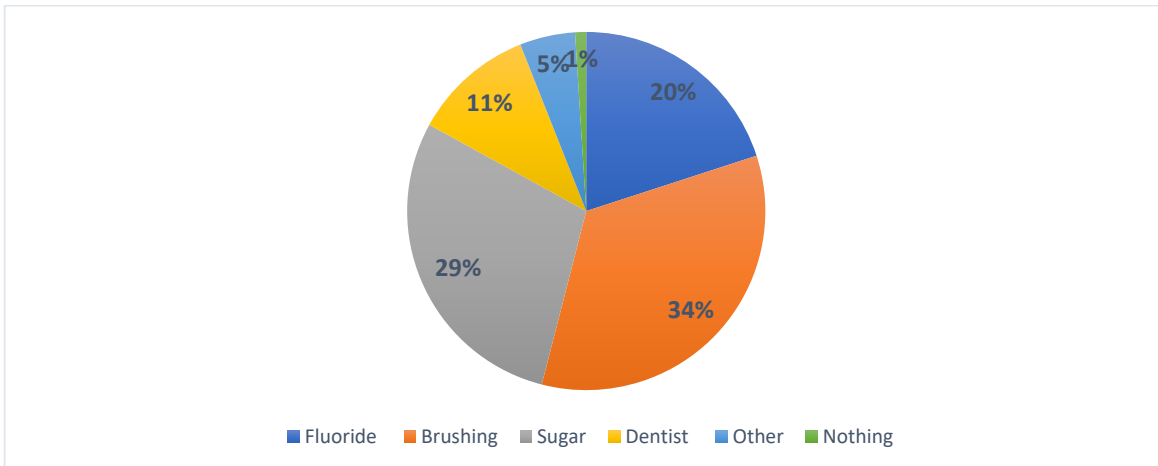

| Fluoride | Brushing | Sugar | Dentist | Other | Nothing |
|----------|----------|-------|---------|-------|---------|
| 20%      | 34%      | 29%   | 11%     | 5%    | 1%      |
| 168      | 280      | 236   | 91      | 45    | 4       |

### Themes of commitment to change reported by patients/ families

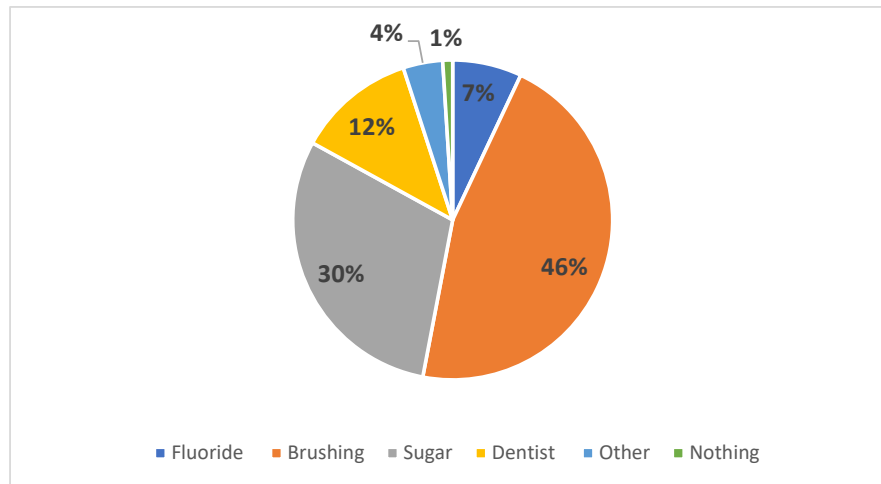

| Fluoride | Brushing | Sugar | Dentist | Other | Nothing |
|----------|----------|-------|---------|-------|---------|
| 7%       | 46%      | 30%   | 12%     | 4%    | 1%      |
| 58       | 374      | 243   | 100     | 36    | 6       |

## (iii) TRAINING

## KPI 3: Number of people attending the training session

| Time       | Number of people trained |
|------------|--------------------------|
| 24/11/2019 |                          |
| 01/12/2019 |                          |
| 08/12/2019 |                          |
| 15/12/2019 |                          |
| 22/12/2019 | 15                       |
| 29/12/2019 |                          |
| 05/01/2020 |                          |
| 12/01/2020 |                          |
| 19/01/2020 |                          |
| 26/01/2020 |                          |
| 02/02/2020 |                          |
| 09/02/2020 |                          |
| 16/02/2020 |                          |
| 23/02/2020 |                          |
| 01/03/2020 |                          |
| 08/03/2020 |                          |
| 15/03/2020 |                          |
| 22/03/2020 |                          |
| 29/03/2020 |                          |
| 05/04/2020 |                          |
| 12/04/2020 |                          |
| 19/04/2020 |                          |
| 26/04/2020 |                          |
| 03/05/2020 |                          |
| 10/05/2020 |                          |
| 17/05/2020 |                          |
| 24/05/2020 |                          |
| 31/05/2020 |                          |
| 07/06/2020 |                          |
| 14/06/2020 |                          |
| 21/06/2020 |                          |
| 28/06/2020 |                          |
| 05/07/2020 |                          |
| 12/07/2020 |                          |
| 19/07/2020 |                          |
| 26/07/2020 |                          |
| 02/08/2020 |                          |
| 09/08/2020 |                          |
| 16/08/2020 |                          |
| 23/08/2020 |                          |
| 30/08/2020 | 9                        |
| 06/09/2020 | 7                        |
| 13/09/2020 |                          |
| 20/09/2020 |                          |
| 27/09/2020 | 4                        |
| 04/10/2020 | 2                        |
| 11/10/2020 | 12                       |
| 18/10/2020 |                          |
| 25/10/2020 | 4                        |
| 01/11/2020 |                          |
| 08/11/2020 | 2                        |

| Time       | Number of people trained |
|------------|--------------------------|
| 15/11/2020 | 1                        |
| 22/11/2020 |                          |
| 29/11/2020 | 6                        |
| 06/12/2020 | 1                        |
| 13/12/2020 |                          |
| 20/12/2020 | 1                        |
| 27/12/2020 |                          |
| 03/01/2021 |                          |
| 10/01/2021 |                          |
| 17/01/2021 |                          |
| 24/01/2021 |                          |
| 31/01/2021 |                          |
| 07/02/2021 |                          |
| 14/02/2021 |                          |
| 21/02/2021 |                          |
| 28/02/2021 |                          |
| 07/03/2021 |                          |
| 14/03/2021 |                          |
| 21/03/2021 |                          |
| 28/03/2021 |                          |
| 04/04/2021 |                          |
| 11/04/2021 |                          |
| 18/04/2021 |                          |
| 25/04/2021 |                          |
| 02/05/2021 | 3                        |
| 09/05/2021 | 1                        |
| 16/05/2021 |                          |
| 23/05/2021 |                          |
| 30/05/2021 | 3                        |
| 06/06/2021 |                          |
| 13/06/2021 |                          |
| 20/06/2021 |                          |
| 27/06/2021 |                          |
| 04/07/2021 | 1                        |
| 11/07/2021 | 1                        |
| 18/07/2021 |                          |
| 25/07/2021 |                          |
| 01/08/2021 |                          |
| 08/08/2021 |                          |
| 15/08/2021 |                          |
| 22/08/2021 |                          |
| 29/08/2021 |                          |

### Role of Staff attending training

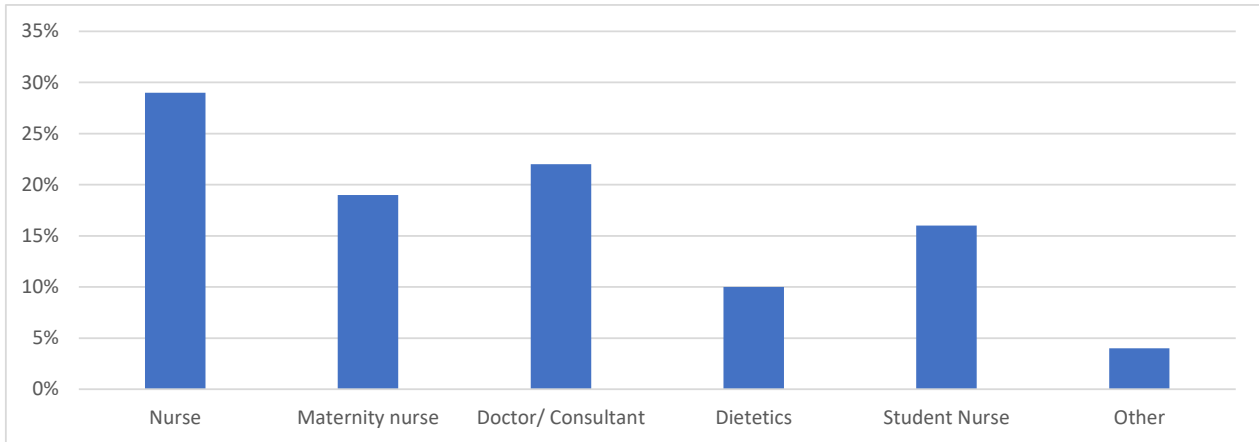

| Nurse | Maternity nurse | Doctor/ Consultant | Dietetics | Student Nurse | Other |
|-------|-----------------|--------------------|-----------|---------------|-------|
| 29%   | 19%             | 22%                | 10%       | 16%           | 4%    |
| 21    | 14              | 16                 | 7         | 12            | 3     |

### Staff Learning

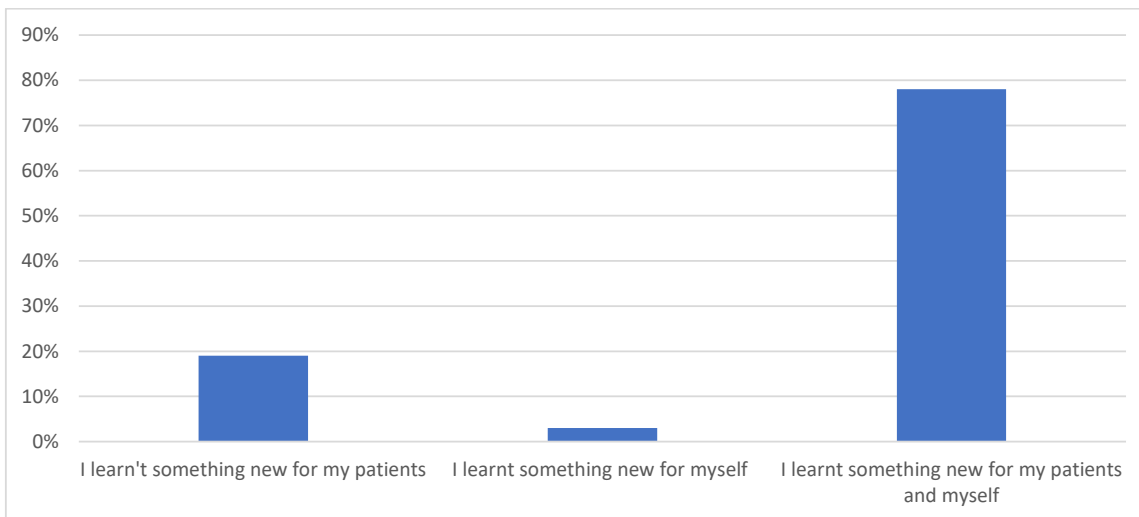

| I learn't something new for my patients | I learnt something new for myself | I learnt something new for my patients and myself |
|-----------------------------------------|-----------------------------------|---------------------------------------------------|
| 19%                                     | 3%                                | 78%                                               |
| 6                                       | 1                                 | 25                                                |

**Themes of learning reported by staff**

**Learning for their patients**

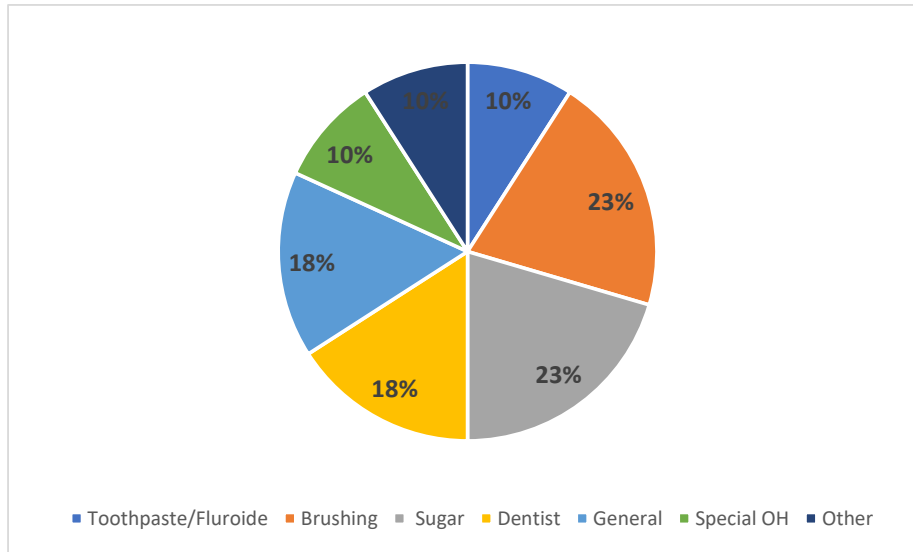

| Toothpaste /Fluoride | Brushing | Sugar | Dentist | General | Special OH* | Other |
|----------------------|----------|-------|---------|---------|-------------|-------|
| 10%                  | 23%      | 23%   | 18%     | 18%     | 10%         | 10%   |
| 4                    | 9        | 9     | 7       | 7       | 4           | 4     |

(\* ) Offering special oral health advice for specific groups of patients (e.g., for children with additional needs, such as unsafe swallow or autism)

**Learning for themselves and/or their family**

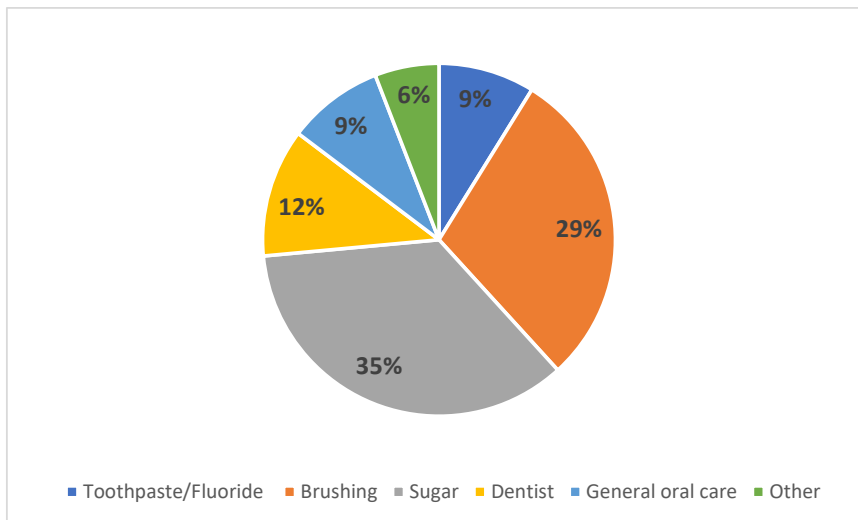

| Toothpaste/Fluoride | Brushing | Sugar | Dentist | General oral care | Other |
|---------------------|----------|-------|---------|-------------------|-------|
| 9%                  | 29%      | 35%   | 12%     | 9%                | 6%    |
| 3                   | 10       | 12    | 4       | 3                 | 2     |

**Themes of commitment to change reported by staff**

**Commitment to change for their patients**

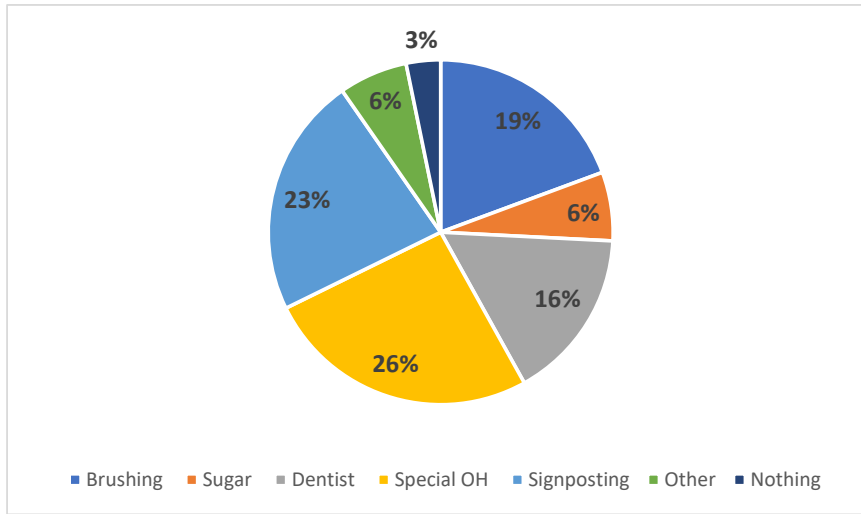

| Brushing | Sugar | Dentist | Special OH* | Signposting | Other | Nothing |
|----------|-------|---------|-------------|-------------|-------|---------|
| 19%      | 6%    | 16%     | 26%         | 23%         | 6%    | 3%      |
| 6        | 2     | 5       | 8           | 7           | 2     | 1       |

(\*) Offering special oral health advice for specific groups of patients (e.g., for children with additional needs, such as unsafe swallow or autism)

**Commitment to change for themselves and/or their family**

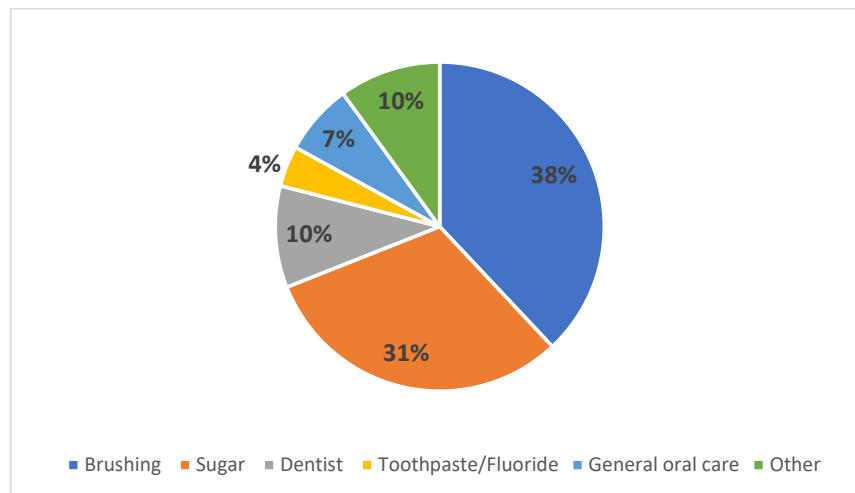

| Brushing | Sugar | Dentist | Toothpaste /Fluoride | General oral care | Other |
|----------|-------|---------|----------------------|-------------------|-------|
| 38%      | 31%   | 10%     | 4%                   | 7%                | 10%   |
| 12       | 9     | 3       | 1                    | 2                 | 3     |
